# Supplementary material for: Common, germline genetic variations in the novel tumor suppressor BAP1 and risk of developing different types of cancer
Source: PubMed Central journal article supplement (PMC5650391; doi:10.18632/oncotarget.20465), 2017-08-24
Supplement: oncotarget-08-74936-s001.pdf [file oncotarget-08-74936-s001.pdf]

# Common, germline genetic variations in the novel tumor suppressor *BAP1* and risk of developing different types of cancer

## SUPPLEMENTARY MATERIALS

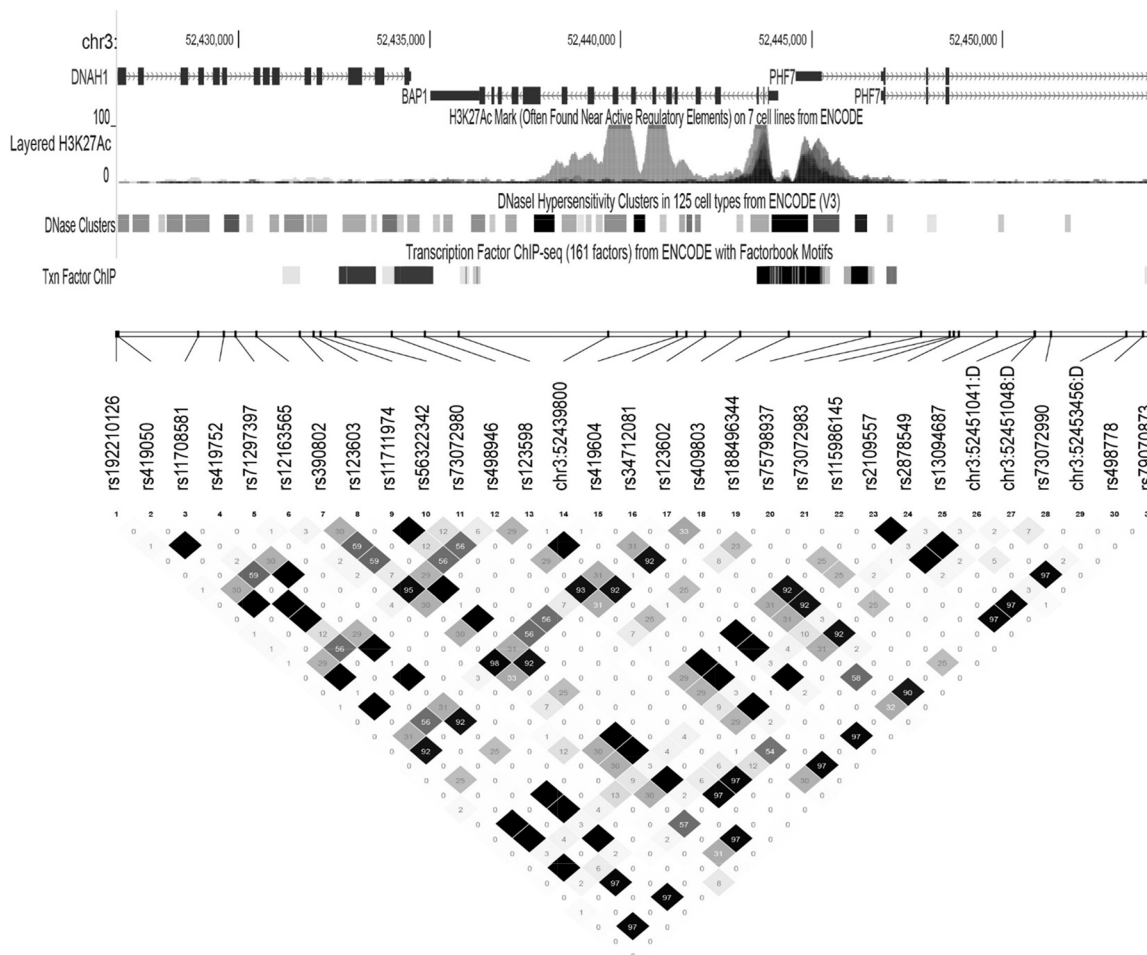

Supplementary Figure 1: Genome annotation and LD structure of the region covering *BAP1*.

Supplementary Table 1: Distribution of sex and smoking in each cancer site

| Variables                   | Cases       |              | P       | Controls    |              | P       |
|-----------------------------|-------------|--------------|---------|-------------|--------------|---------|
|                             | Male, n(%)  | Female, n(%) |         | Male, n(%)  | Female, n(%) |         |
| <b>Bladder cancer</b>       |             |              |         |             |              |         |
| Never smoker                | 236(24.53)  | 104(40.78)   |         | 377(32.95)  | 114(39.58)   |         |
| Ever smoker                 | 726(75.47)  | 151(59.22)   | 2.7E-07 | 767(67.05)  | 174(60.42)   | 0.03    |
| <b>Colorectal cancer</b>    |             |              |         |             |              |         |
| Never smoker                | 647(47.93)  | 623(62.93)   |         | 506(37.59)  | 393(39.90)   |         |
| Ever smoker                 | 703(52.07)  | 367(37.07)   | 6.1E-13 | 840(62.41)  | 592(60.10)   | 0.26    |
| <b>Esophageal cancer</b>    |             |              |         |             |              |         |
| Never smoker                | 228(26.15)  | 42(36.21)    |         | 342(33.40)  | 56(41.79)    |         |
| Ever smoker                 | 644(73.85)  | 74(63.79)    | 0.02    | 682(66.60)  | 78(58.21)    | 0.05    |
| <b>Renal cell carcinoma</b> |             |              |         |             |              |         |
| Never smoker                | 341(40.31)  | 239(56.77)   |         | 319(36.21)  | 169(38.32)   |         |
| Ever smoker                 | 505(59.69)  | 182(43.23)   | 3E-08   | 562(63.79)  | 272(61.68)   | 0.45    |
| <b>Lung cancer</b>          |             |              |         |             |              |         |
| Never smoker                | 205(11.24)  | 384(25.79)   |         | 205(11.24)  | 384(25.79)   |         |
| Ever smoker                 | 1619(88.76) | 1105(74.21)  | 1.2E-27 | 1619(88.76) | 1105(74.21)  | 1.2E-27 |

**Supplementary Table 2: HaploReg v2 analysis of rs11708581, rs390802, and rs12163565 and their correlated variants ( $r^2 > 0.80$ )**

See Supplementary File 1

**Supplementary Table 3: Regulome analysis of rs11708581, rs390802, and rs12163565**

| #chromosome | coordinate | rsid       | hits                          | score                    |
|-------------|------------|------------|-------------------------------|--------------------------|
| chr3        | 52428987   | rs11708581 | Chromatin_Structure DNase-seq | TF binding or DNase peak |
| chr3        | 52430525   | rs12163565 | Chromatin_Structure DNase-seq | TF binding or DNase peak |
| chr3        | 52431670   | rs390802   | Chromatin_Structure DNase-seq | TF binding or DNase peak |
